# Supplementary material for: Abrupt onset of the capillary-wave spectrum at wall–fluid interfaces
Source: Royal Society of Chemistry journal article supplement (doi:10.1039/d3sm00761h), 2023-01-01
Supplement: d3sm00761h1.pdf [file d3sm00761h1.pdf]

## SUPPLEMENTARY MATERIAL

### *”Abrupt onset of the capillary-wave spectrum at wall-fluid interfaces”*

A.O. Parry<sup>1</sup> and C. Rascón<sup>2</sup>

<sup>1</sup>*Department of Mathematics, Imperial College London, London SW7 2BZ, UK*

<sup>2</sup>*GISC, Departamento de Matemáticas, Universidad Carlos III de Madrid, 28911 Leganés, Madrid, Spain*

**Here we present a detailed account of the theoretical calculations that lead to the paper’s results.**

Our study is based on a simple square-gradient density functional model of fluid adsorption in systems with short-ranged forces near a wall situated in the  $z = 0$  plane. We adopt a magnetic notation with local order-parameter  $m(\mathbf{r})$ , for which the free-energy functional is written

$$F[m] = \int d\mathbf{r} \left\{ \frac{1}{2} (\nabla m)^2 + \phi(m) \right\} + \int d\mathbf{x} \phi_1(m_1) \quad (1)$$

where  $\phi(m)$  is a double-well bulk potential and  $\phi_1(m) = cm^2/2 - h_1m$  is the surface interaction, which couples to the magnetisation at the wall  $m_1$  via a surface enhancement  $c$  and a surface field  $h_1$ . For simplicity, we assume an Ising symmetry denoting the bulk spontaneous magnetization  $m_0$  and  $\kappa = 1/\xi_b$  the inverse of the bulk correlation length. We begin by supposing that the bulk magnetic field is  $h = 0^-$  so that the bulk magnetization at subcritical temperatures takes the value  $-m_0$ . Minimizing  $F[m]$ , assuming translational invariance along the wall, yields the Euler-Lagrange equation

$$m''(z) = \phi'(m) \quad (2)$$

which has a first integral that determines the equilibrium magnetization profile  $m(z)$ :

$$m'(z) = \pm \sqrt{2(\phi(m) - \phi(m_0))} \quad (3)$$

together with the boundary condition  $m'(0) = cm_1 - h_1$ . The  $\pm$  signs apply for the cases  $m_1 < -m_0$  and  $m_1 > -m_0$  respectively, to which we shall return shortly. The elegant graphical solution (or Cahn construction [1]) based on the well-known analogy with the mechanical conservation of energy [2], determines both the equilibrium profiles and the Nakanishi-Fisher global surface phase diagrams [3].

Here, we focus on the properties of the correlation function  $G(\mathbf{r}, \mathbf{r}') = \langle m(\mathbf{r})m(\mathbf{r}') \rangle - m(z)m(z')$  which we study via its transverse Fourier transform  $G(z, z'; q)$ , where  $\mathbf{q}$  is a 2D wavevector parallel to the wall with modulus  $q$ . This correlation function satisfies the inhomogeneous Ornstein-Zernike equation [2, 4] which, for our square-gradient model, reduces to

$$(\mathcal{L} + q^2)G(z, z'; q) = \delta(z - z') \quad (4)$$

where

$$\mathcal{L} = -\partial_z^2 + \phi''(m(z)) \quad (5)$$

together with the boundary condition  $\partial_z G(z, z'; q)|_{z=0} = cG(0, z')$ , and we have set  $k_B T = 1$ . This is similar to the equation for the propagator in simple quantum mechanics and has an analogous spectral expansion

$$G(z, z'; q) = \sum_n \frac{\psi_n^*(z) \psi_n(z')}{E_n + q^2} \quad (6)$$

with normalised wavefunctions satisfying the Shrödinger-like equation

$$\mathcal{L} \psi_n(z) = E_n \psi_n(z) \quad (7)$$

together with boundary conditions  $\psi'_n(0) = c\psi_n(0)$  and  $\psi_n(\infty) = 0$ . In general, the sum (6) contains both bound states, for which  $E_n < \kappa^2$ , and a continuum of scattering states with higher energies  $E_n \geq \kappa^2$ .

For the " $m^4$ " potential

$$\phi(m) = -\frac{t}{2} m^2 + \frac{u}{4} m^4 \quad (8)$$

where  $t = T_c - T$  and  $u > 0$ , the profiles following from (3) are given explicitly by the simple hyperbolic functions

$$m(z) = \begin{cases} m_0 \tanh \frac{\kappa(\ell - z)}{2} & \text{for } m_1 > -m_0 \\ -m_0 \coth \frac{\kappa(z + z_0)}{2} & \text{for } m_1 < -m_0 \end{cases} \quad (9)$$

where  $\kappa = \sqrt{2t}$  and  $m_0 = \sqrt{t/u}$ . Defining the parameter  $\tau = m_1/m_0$ , or equivalently  $\tau = \tanh \frac{\kappa\ell}{2}$  for  $1 > \tau > -1$  and  $\tau = -\coth \frac{\kappa z_0}{2}$  for  $\tau < -1$  allows us to link the familiar Cahn construction with the eigenvalue spectrum over the whole range of allowed equilibrium, metastable and unstable thin film profiles, and is related to  $c$  and  $h_1$  via the simple quadratic relation

$$\tau^2 - 2 \frac{c}{\kappa} \tau + 2 \frac{h_1}{m_0 \kappa} - 1 = 0 \quad (10)$$

determining the corresponding values of  $\ell$  and  $z_0$ .

The bound state eigenfunctions are given explicitly by

$$\psi_n(z) \propto e^{-\sqrt{k^2 - E_n} z} f\left(\frac{m(z)}{m_0}\right) \quad (11)$$

where  $f(x) = x^2 - 2\sqrt{1 - E_n \xi_b^2} x + 1 - \frac{4}{3} E_n \xi_b^2$ , with corresponding eigenvalues satisfying

$$\frac{\sqrt{k^2 - E_n} - \kappa \tau}{\sqrt{k^2 - E_n} + c} = \frac{f(\tau)}{1 - \tau^2} \quad (12)$$

which shows a 2D/3D crossover (a non-thermodynamic singularity) when the ground-state eigenvalue reaches the value  $E_0 = \kappa^2$ , yielding the following equation for the location of the crossover  $\tau_*$ :

$$\kappa \tau_* (\tau_*^2 - 1) = c \left( \tau_*^2 - \frac{1}{3} \right) \quad (13)$$

Note that, for the " $m^4$ " potential (8), the lines of critical and first-order wetting occur along

$$\frac{1}{2} \left( \tilde{c}^2 + 1 + 2\tilde{h}_1 \right)^{3/2} - \frac{1}{2} \left( \tilde{c}^2 + 1 - 2\tilde{h}_1 \right)^{3/2} - 3\tilde{c}\tilde{h}_1 = 1 \quad (14)$$

where  $\tilde{c} = c/\kappa$  and  $\tilde{h}_1 = h_1/\kappa m_0$ . For  $c > 0$ , a special solution of this is  $c m_0 = h_1$ , corresponding to the line of critical wetting. Therefore, the intersection of the lines of dimensional reduction and first-order wetting occurs when

$$\tau_w = \tau_* \quad (15)$$

which determines the value of  $c_\dagger$ . Using (10), (13) and (14) yields the numerical result

$$c_\dagger \approx -0.3375 \kappa \quad (16)$$

Finally, we note that the Cahn construction determines that, for  $c < 0$ , the adsorption of the microscopic wetting layer is zero when  $h_1 = -c m_0$ , which from (14) occurs for the point on the line of first-order wetting transitions at which

$$c = (1 - 2^{1/3}) \kappa \quad (17)$$

Together with the result for  $c_\dagger$ , this determines that the temperatures  $T_{\text{DR}}$  and  $T_{\Gamma=0}$ , which define regimes (i), (ii) and (iii) along the line of first-order wetting for  $c < 0$ , satisfy

$$\frac{T_c - T_{\text{DR}}}{T_c - T_{\Gamma=0}} \approx 0.5931 \quad (18)$$

- 
- [1] J. W. Cahn, Critical Point Wetting, J. Chem. Phys. **66**, 3667 (1977).
  - [2] J. S. Rowlinson and B. Widom, *Molecular Theory of Capillarity* (Clarendon Press, 1982).
  - [3] H. Nakanishi and M. E. Fisher, Multicriticality of Wetting, Prewetting, and Surface Transitions, Phys. Rev. Lett. **49**, 1565 (1982).
  - [4] R. Evans, The nature of the liquid-vapour interface and other topics in the statistical mechanics of non-uniform, classical fluids, Adv. Phys. **28**, 143 (1979).
